# Supplementary material
Source: PubMed Central journal article supplement (PMC4146662)
Supplement: NIHMS607491-supplement-01.pdf [file NIHMS607491-supplement-01.pdf]

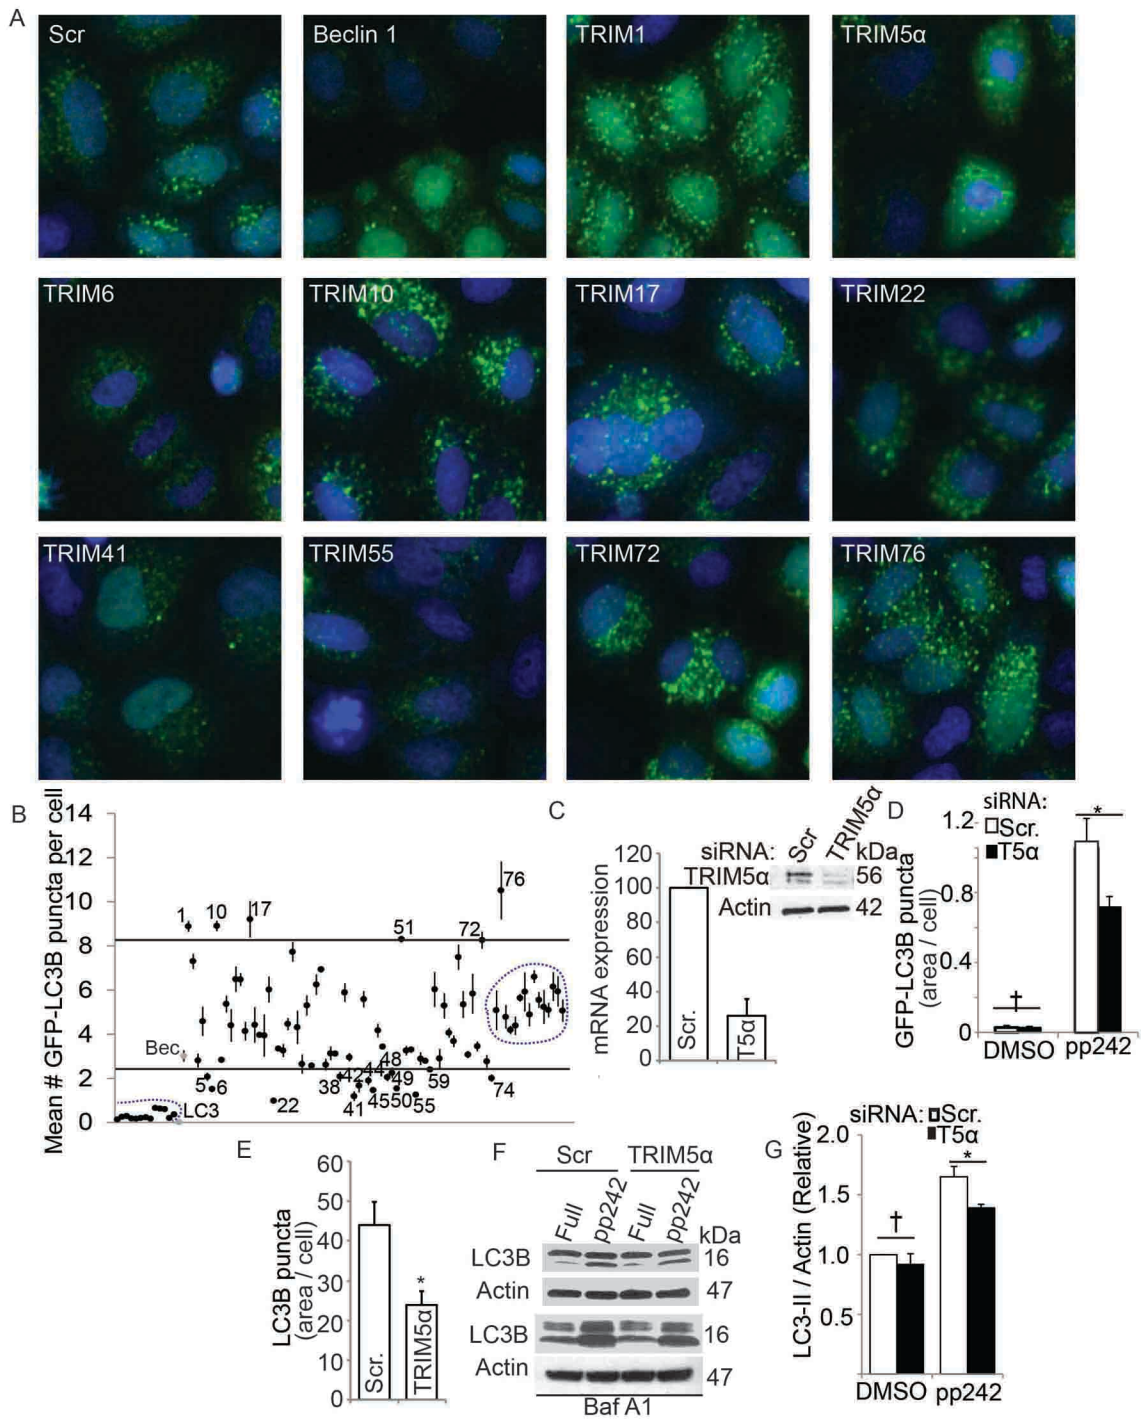

**Supplementary Figure S1 related to Figure 1. TRIM proteins regulate autophagy.**

(A) Representative images (epifluorescence, high content Cellomics HCS scanner) of cells expressing green-fluorescent LC3B transfected with non-targeting siRNA (Scr), siRNA against Beclin 1, or against selected TRIMs (see Fig. 1B) after treatment with pp242. Green, GFP-LC3B. Blue, nuclei. (B) High content image analysis of TRIM siRNA screen as in Figure 1, plotted here as number of LC3B puncta per cell. Labeling as in

Figure 1B. **(C)** Evaluation of TRIM5 $\alpha$  knockdown efficiency by q-RT-PCR (graph) and immunoblot (gel). **(D)** Effects of TRIM5 $\alpha$  knockdown in HeLa cells on GFP-LC3B puncta (area/cell; Cellomics HC analysis) under basal (DMSO control) and autophagy-inducing (pp242) conditions. T5a, TRIM5 $\alpha$  siRNA; Scr, Scrambled control siRNA. Knockdown of TRIM5 $\alpha$  with an siRNA Smartpool (Dharmacon: GCAGAAAGUUGAUCAUUGU, GAGAGUAGCUGCCCUGUGU, GGAAUCCUGGUUAAUGUAA, and UUACCAGCCUGAGAACAUA). **(E)** Effect of TRIM5 $\alpha$  knockdown on LC3B puncta. HeLa cells were transfected with scrambled siRNA or an siRNA against TRIM5 $\alpha$  that was different from any of the siRNAs in the Smartpool (sequence: CUCUGAAACUGAGAUGGUG), and treated with pp242 for 2 h. Cells were stained to detect endogenous LC3B and high content imaging and analysis employed to assess abundance of LC3B puncta. **(F)** Lysates from HeLa cells subjected to TRIM5 $\alpha$  knockdown and treated or not with pp242 in the presence of bafilomycin A1 were analyzed by immunoblotting as indicated. **(G)** Quantification of LC3B blots (two examples in F). Data, means  $\pm$  SE;  $n \geq 3$  experiments \*;  $P < 0.05$  (t test).

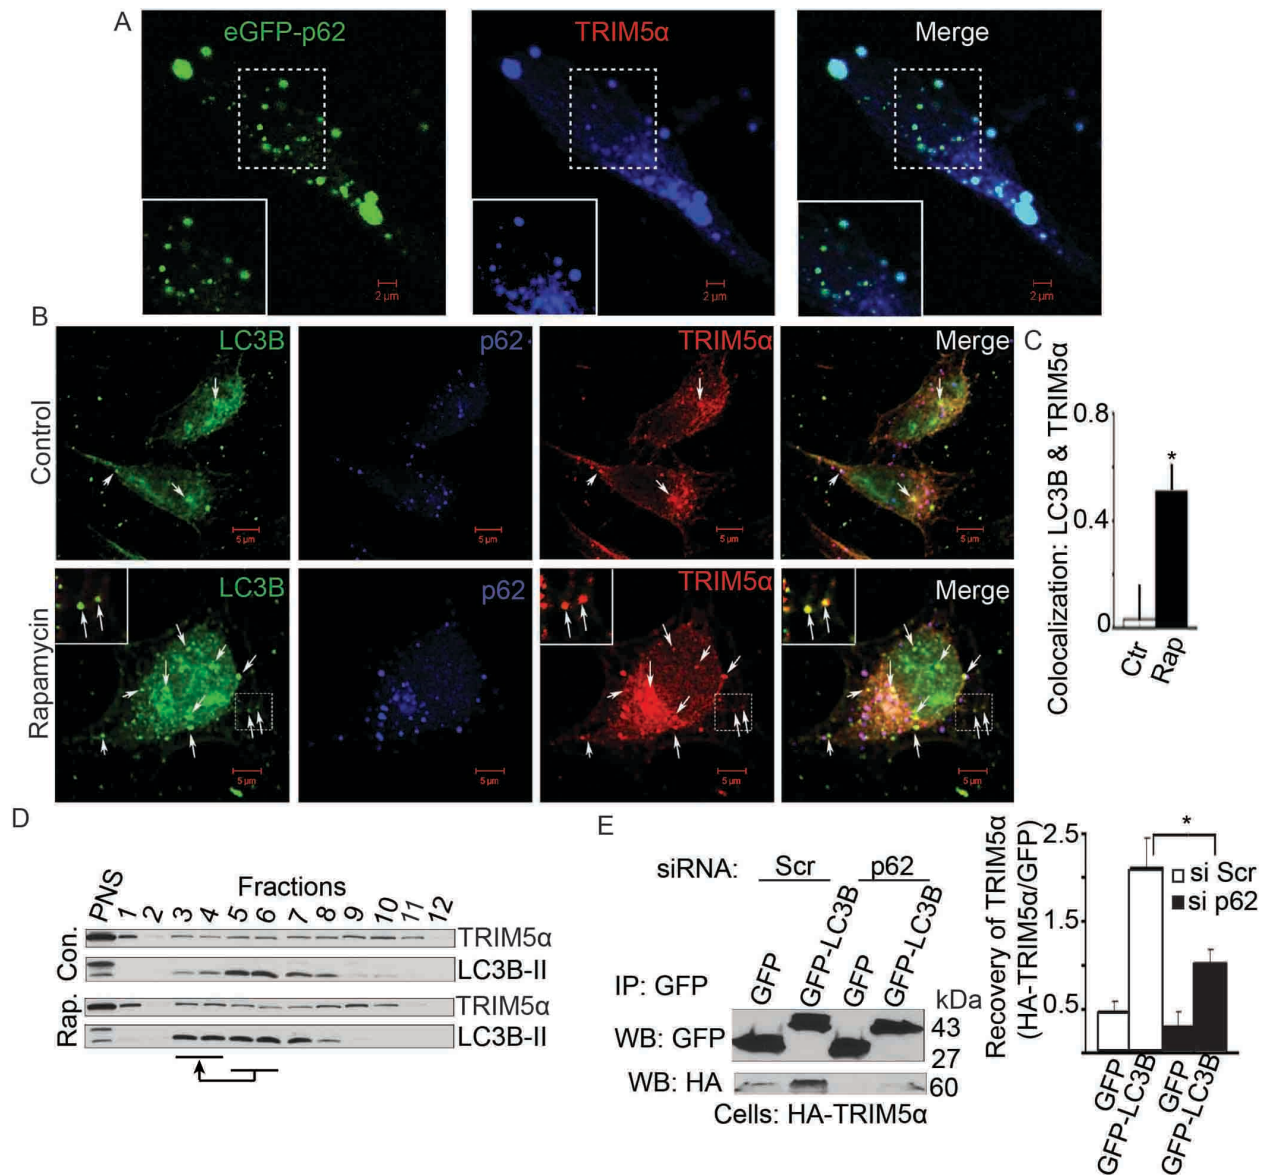

**Supplementary Figure S2 related to Figure 2. TRIM5α is in complexes with p62 and LC3B.**

(A) Confocal immunofluorescence microscopy of cells expressing GFP-p62 (green) and HA-tagged TRIM5α (blue). (B) Confocal immunofluorescent microscopy of LC3B, p62, and HA-RhTRIM5α under basal and rapamycin-induced autophagy conditions. Arrows, overlaps between LC3B and HA-TRIM5α. (C) Pearson's coefficient of co-localization (calculated using SLIDEBOOK 5.0, Intelligent Imaging Innovations) between LC3B and HA-TRIM5α. Pearson's colocalization coefficient ( $R_r = \frac{\sum[(S_{1i} - S_{1avg}) \times (S_{2i} - S_{2avg})]}{[\sum(S_{1i} - S_{1avg})^2 \times \sum(S_{2i} - S_{2avg})^2]^{1/2}}$ ) ( $R_r$  values range:  $\geq -1 R_r \leq +1$ ) was calculated using SLIDEBOOK 5.0 (Intelligent Imaging Innovations). (D) Membranous organelles from untreated (top)

or rapamycin-treated (bottom) HeLa cells expressing HA-TRIM5 $\alpha$  were separated by isopycnic centrifugation in sucrose gradients. Arrow, shift upon rapamycin treatment. (E) Assessment of interaction between GFP-LC3B and HA-tagged TRIM5 $\alpha$  in control cells or cells subjected to p62 knockdown by co-immunoprecipitation. Data, means  $\pm$  SE; n  $\geq$  3 experiments \*;  $P < 0.05$  (t test).



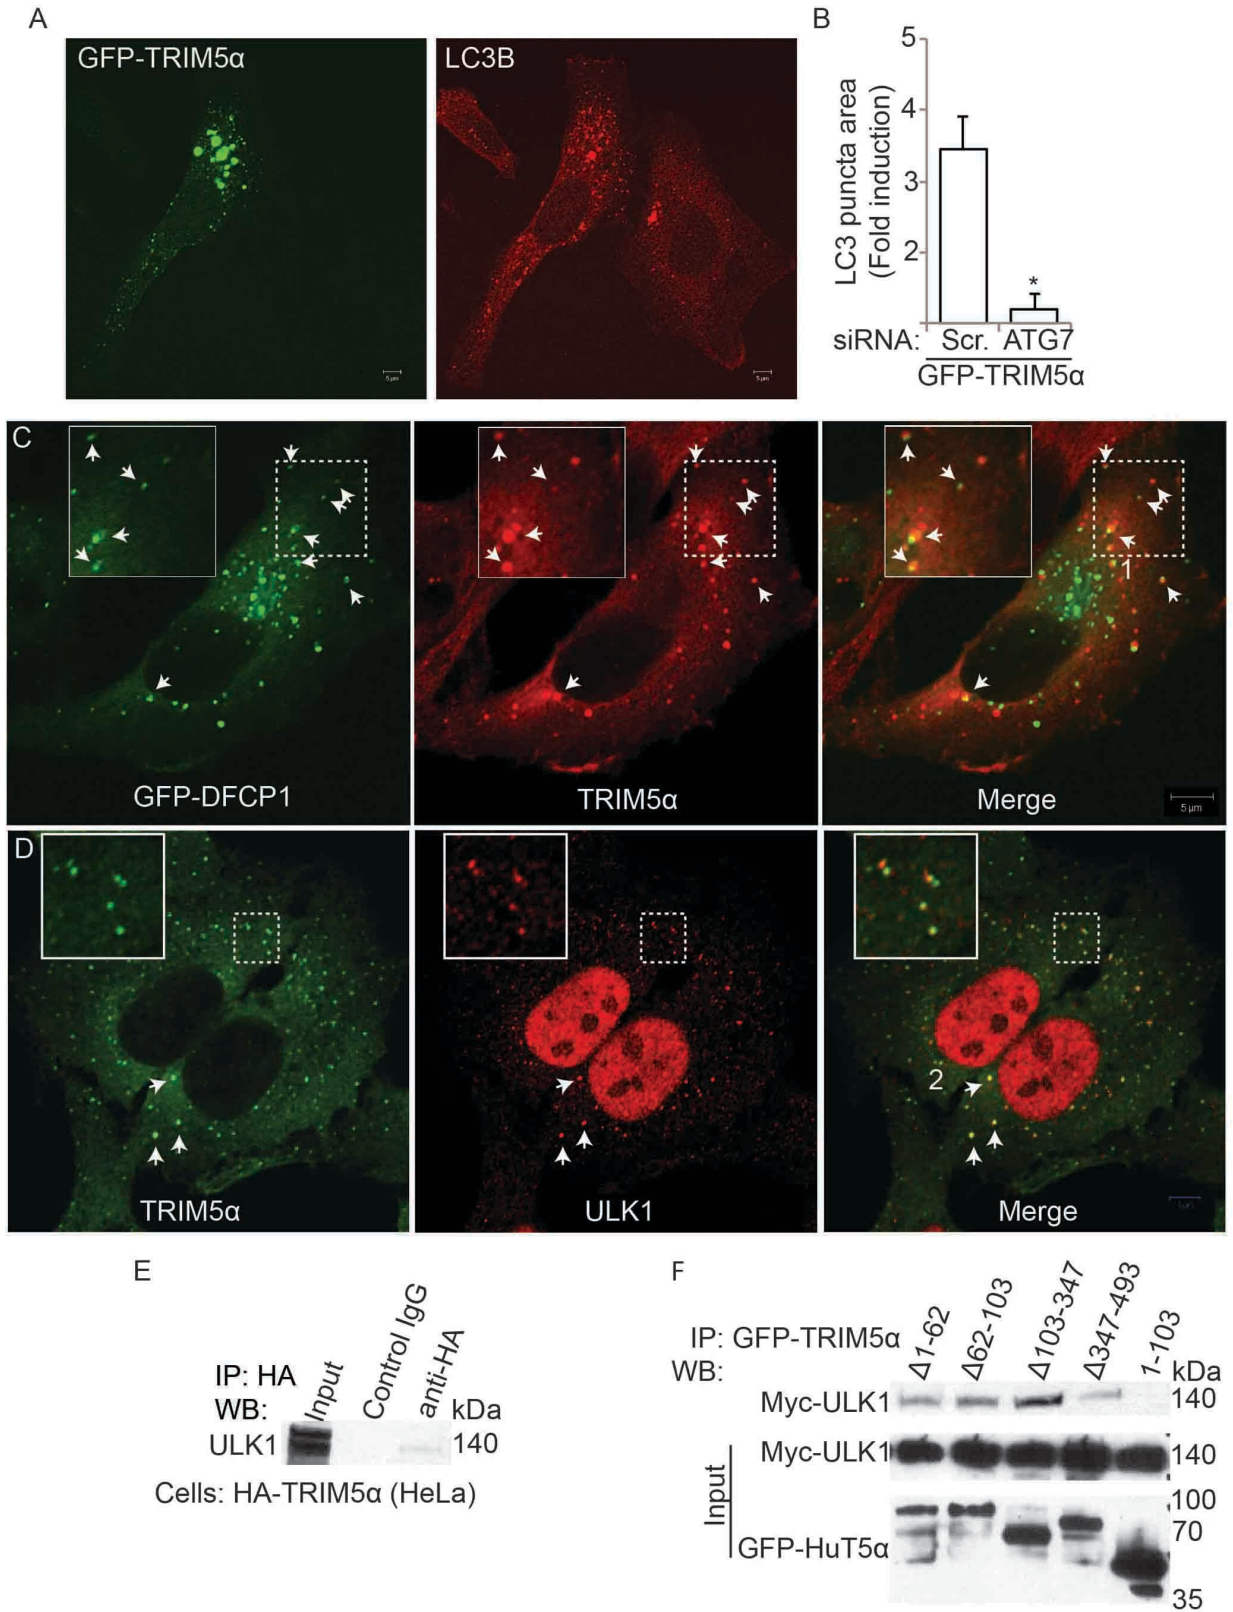

**Supplementary Figure S3 related to Figure 3. TRIM5α promotes autophagosome formation and co-localizes and interacts with ULK1.**

**(A)** Example of confocal microscopy images of GFP-TRIM5 $\alpha$ -positive and -negative cells immunostained for endogenous LC3B, from samples used in quantitative high content analysis and quantification in Figure 3. **(B)** Fold induction of LC3 puncta area (relative to cells expressing GFP alone) in HeLa cells expressing GFP-TRIM5 $\alpha$  and transfected with control or ATG7 siRNA. **(C)** Single color and merged images corresponding to the image shown in Figure 3C. **(D)** Single color and merged images corresponding to the image shown in Figure 3D. **(E)** Lysates from HA-TRIM5 $\alpha$ -expressing cells were subjected to immunoprecipitation with either anti-HA or an isotype control and immunoblots probed with antibodies recognizing ULK1. **(F)** Immunoprecipitation analysis was performed as described for Figure 3G. See schematic of TRIM5 $\alpha$  deletion constructs in Figure 5A.

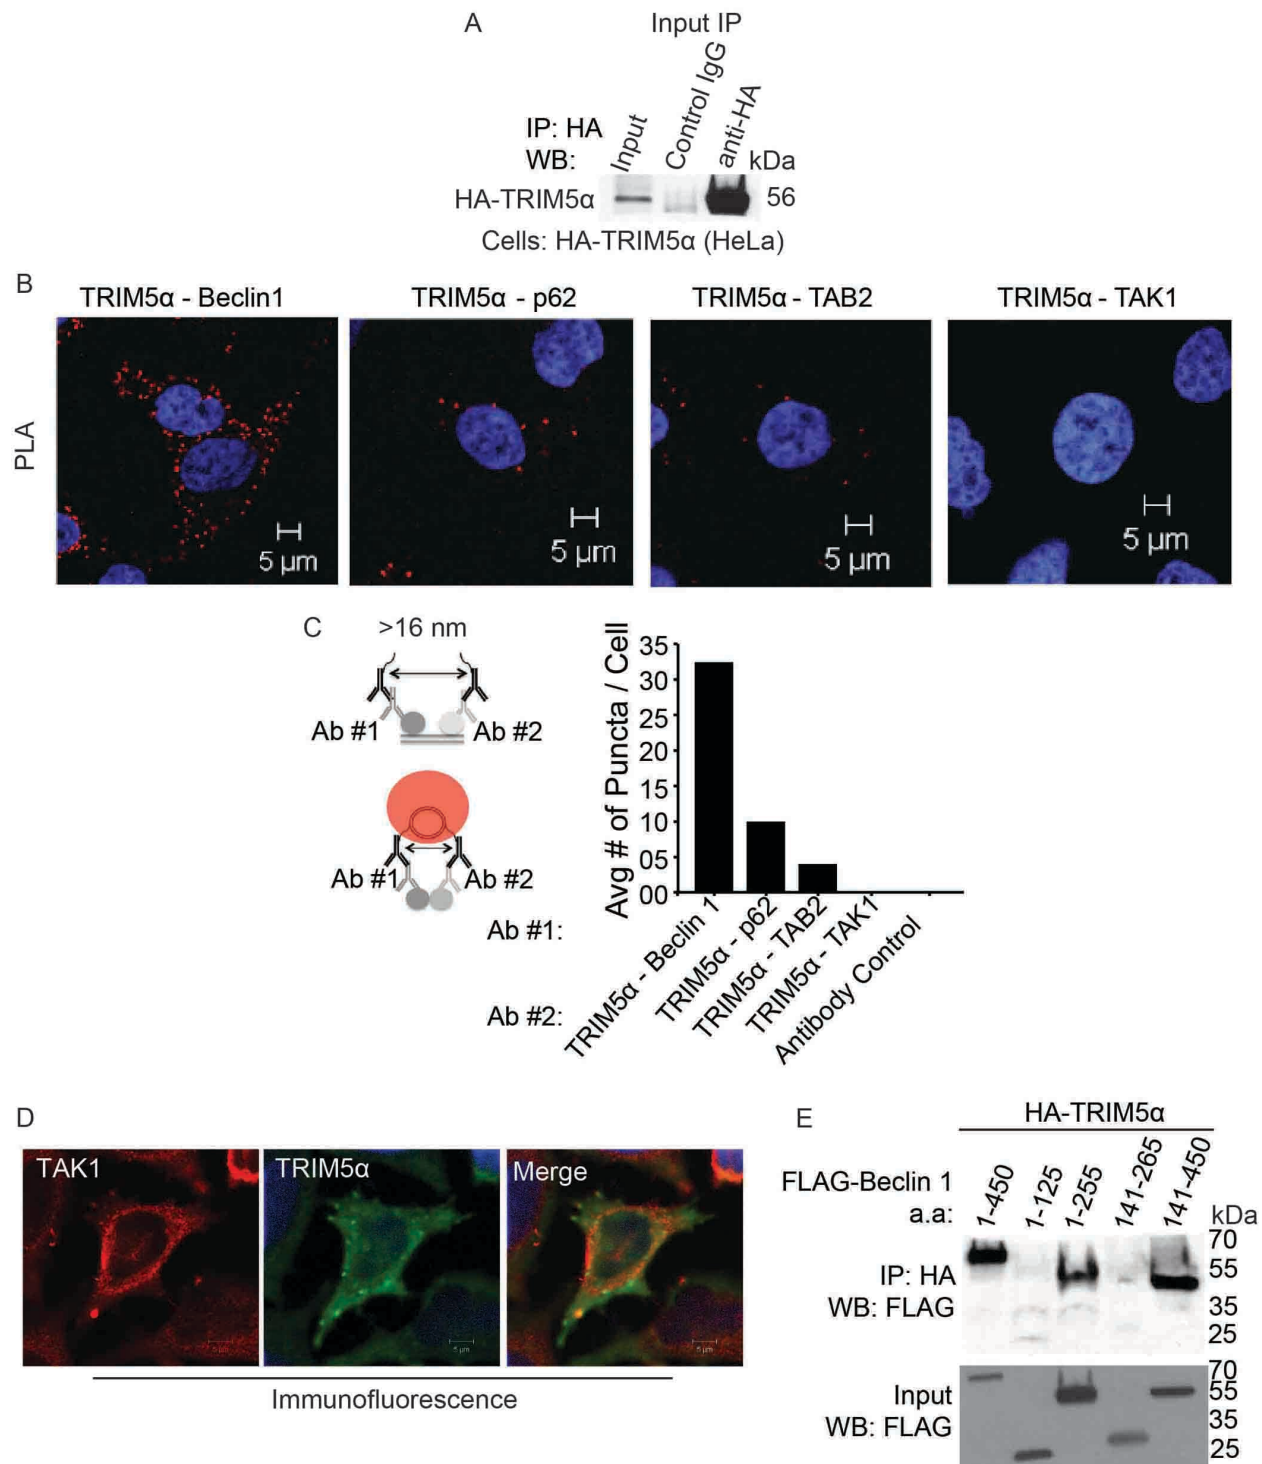

Supplementary Figure S4 related to Figure 4. TRIM5α is in complexes with Beclin 1.

**(A)** Lysates from HeLa cells stably expressing HA-TRIM5 $\alpha$  were subjected to immunoprecipitation with anti-HA or isotype control and blots probed with anti-HA. Corresponds to blots shown in Figure 4E. **(B)** Proximity ligation assay (PLA) for direct in situ protein-protein interactions between HA-RhTRIM5 $\alpha$  (antibody #1/Ab#1 to HA tag) and the indicated proteins (antibody #2/Ab#2 to endogenous Beclin 1, p62, TAB2 or TAK1). **(C)** Schematic of PLA assay: for directly interacting proteins (approximating FRET distances) the distance between Ab#1 and Ab#2 allows a PCR reaction to generate red fluorescent puncta (positive signal). Graph, quantitation of the average number of PLA puncta per cell (N = 200 cells). **(D)** Confocal immunofluorescence microscopy using the antibody pairs and cells as in (A) employed as a control showing that HA-tagged TRIM5 $\alpha$  and TAK1 are recognized by Ab#1 (HA) and Ab#2 (TAK1) in HeLa cells stably expressing HA-TRIM5 $\alpha$ . **(E)** Mapping of Beclin 1 regions interacting with HA-TRIM5 $\alpha$  (see schematic in Figure 5A). 293T cells were transfected with the corresponding constructs (HA-TRIM5 $\alpha$ ; Beclin 1 domains tagged with FLAG epitope; 1-450, full size Beclin 1). Lysates were immunoprecipitated with anti-FLAG and immunoblots probed as indicated.

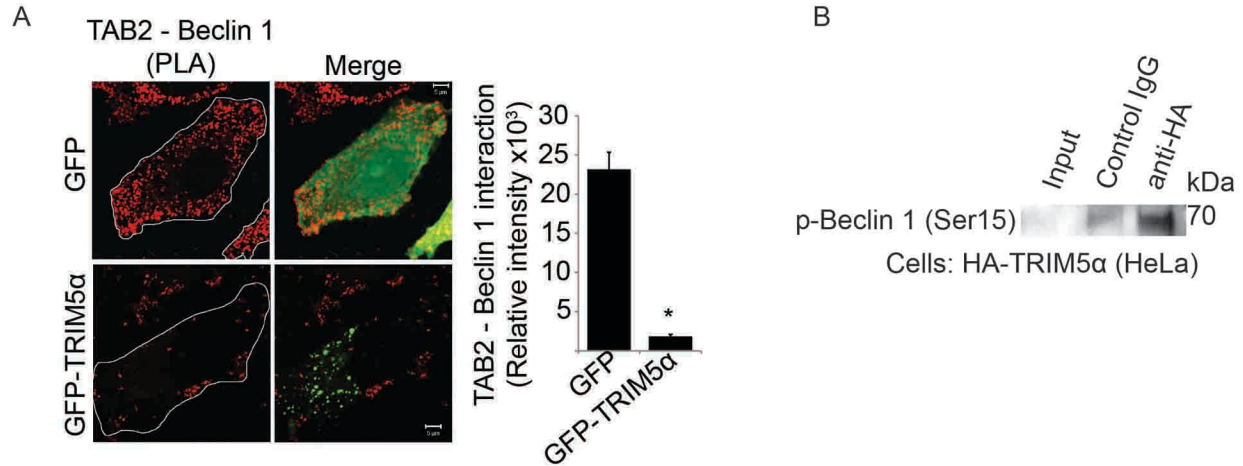

**Supplementary Figure S5 related to Figure 5. TRIM5 $\alpha$  promotes Beclin 1 activation.**

**(A)** PLA analysis of TAB2 - Beclin 1 interactions in HeLa cells expressing GFP-TRIM5 $\alpha$  or GFP alone (white mask). PLA, red dots; diffuse (GFP) or punctate (GFP-TRIM5 $\alpha$ ), green fluorescence. PLA results reported is the total intensity of the PLA signal (sum of all puncta intensity) within green-fluorescent (transfected) cells using ImageJ software.

**(B)** Lysates from HeLa cells stably expressing HA-TRIM5 $\alpha$  and transiently over-expressing FLAG-Beclin 1 were immunoprecipitated with anti-HA antisera and immunoblots probed with antisera recognizing phospho-Beclin 1 (Ser-15). Data, means  $\pm$  SE, n = 3 experiments, \*,  $P < 0.05$ ; (t test).

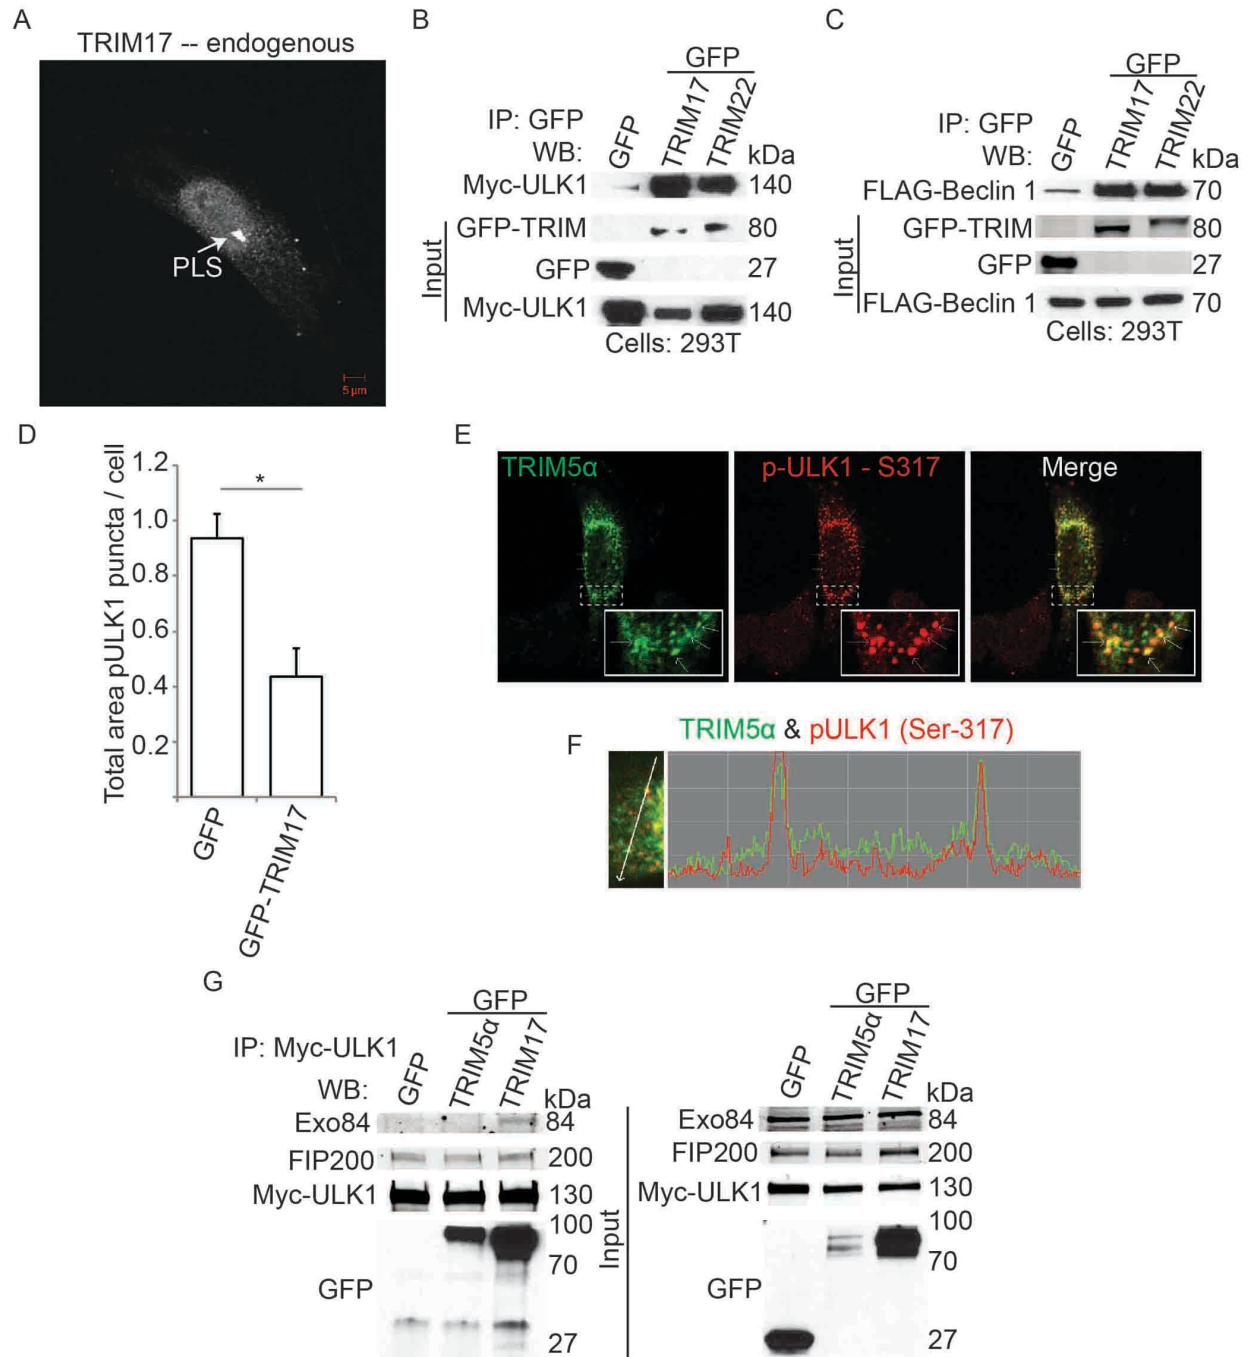

**Supplementary Figure S6 related to Figure 6. TRIM17 interacts with autophagy regulators.**

(A) HeLa cells stained with anti-TRIM17 show prominent large structure profiles (PLS). (B,C) Lysates from 293T cells expressing Myc-ULK1 (B) or FLAG-Beclin 1 (C) and GFP or GFP-TRIM fusions were subjected to immunoprecipitation with anti-GFP and blots were probed with the indicated antibodies. (D) High content imaging analysis of



the abundance of p-ULK1 (Ser-317) puncta (PULKA assay) in HeLa cells expressing GFP or GFP-TRIM17. **(E)** Intracellular distribution of endogenous p-ULK1 (p-Ser 317) in HeLa cells expressing GFP-TRIM5 $\alpha$ . **(F)** Fluorescence intensity line tracings showing phospho-ULK1 localization relative to GFP-TRIM5 $\alpha$ . **(G)** Co-immunoprecipitation analysis of the interaction between Myc-ULK1 and endogenous Exo84 or endogenous FIP200 in lysates from 293T cells expressing GFP or GFP-TRIMs.

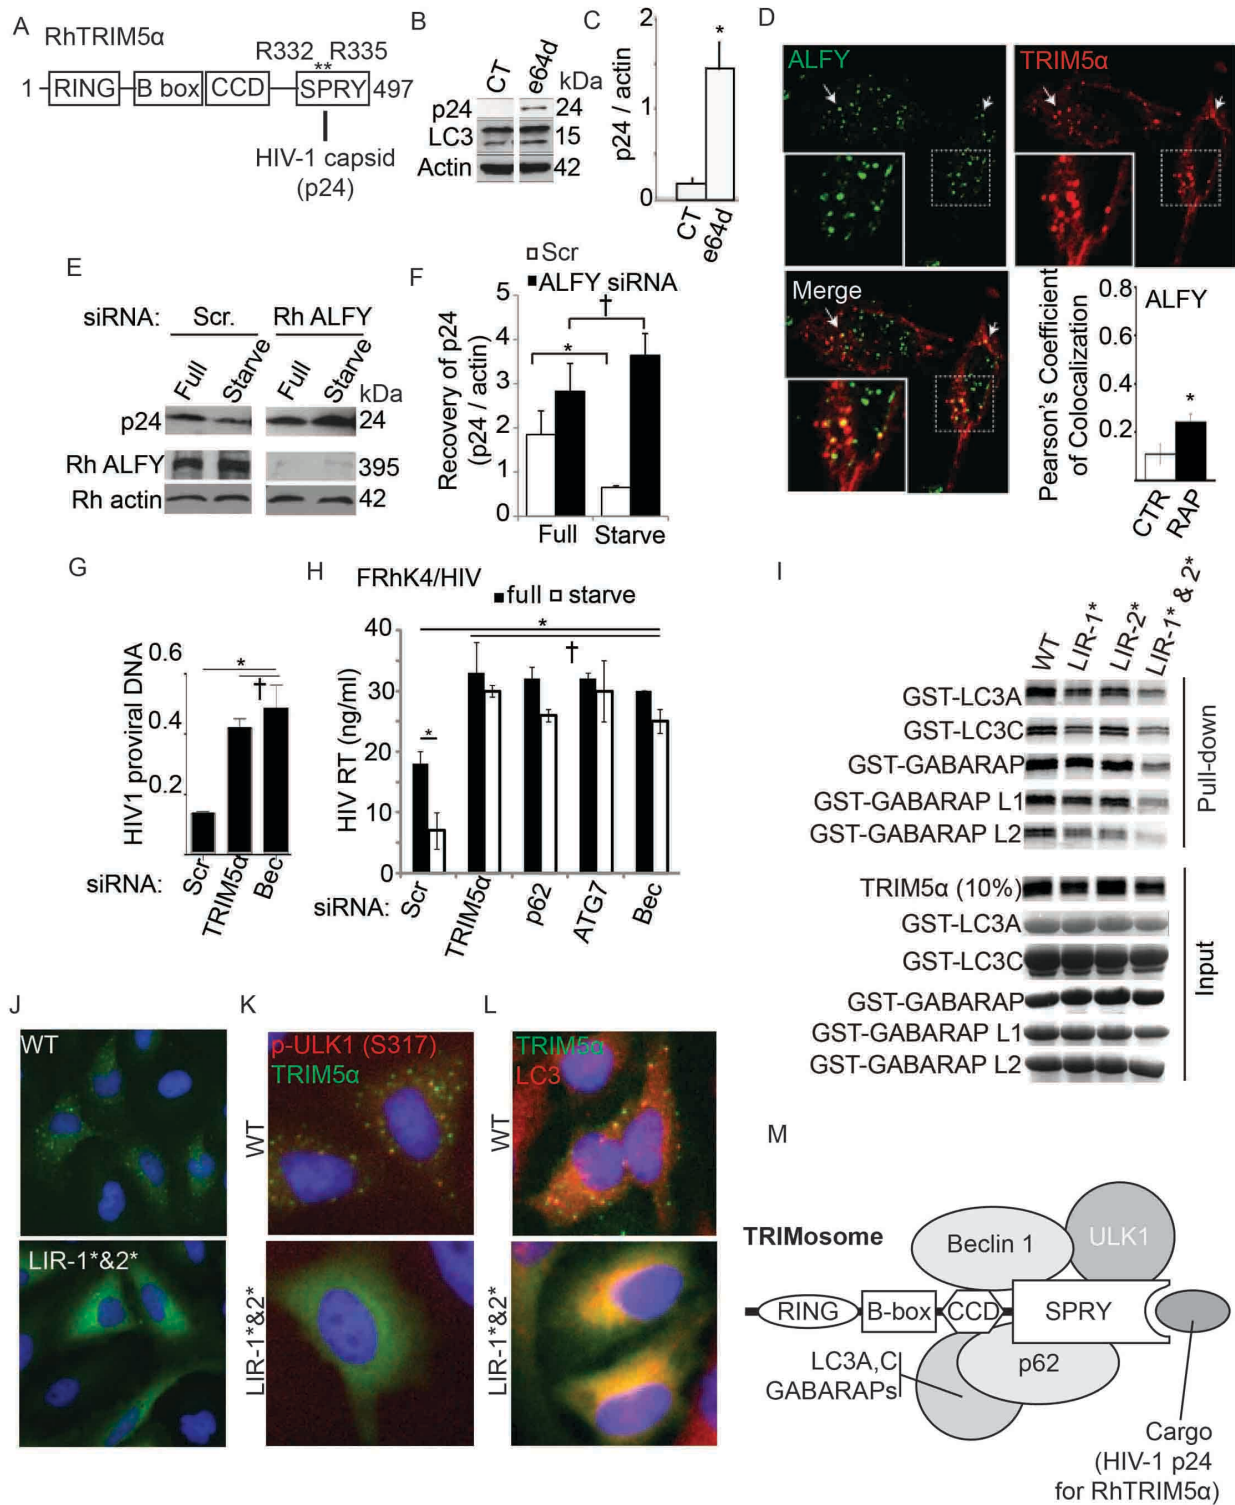

**Supplementary Figure S7 related to Figure 7. TRIM5 $\alpha$  cooperates with ALFY and mAtg8s in targeting its cognate retroviral core for autophagic destruction.**

**(A)** Schematic of rhesus TRIM5 $\alpha$  (RhTRIM5 $\alpha$ ), emphasizing HIV-1 capsid protein (p24) binding domain and key residues (asterisks). **(B,C)** Levels of intracellular p24 were determined by immunoblotting from rhesus cells (FRhK4) that had been exposed to pseudotyped virus including HIV-1 p24 for 4 h in the presence or absence of lysosomal protease inhibitors e64d and pepstatin A (e64d). Bands shown are non-adjacent lanes from the same immunoblot (developed simultaneously). **(D)** Co-localization analysis (graph, Pearson's colocalization coefficient) for ALFY and HA-RhTRIM5 $\alpha$  in HeLa cells. RAP, autophagy induced with rapamycin. CTRL, control (vehicle). Arrows, examples of colocalization between ALFY and HA-RhTRIM5 $\alpha$ . See legend Suppl. Figure S2C. **(E,F)** Effects of rhesus ALFY knockdown on p24 levels in FRhK4 cells following exposure to pseudotyped HIV-1. Cells were incubated in full or starvation media following infection. **(G)** HIV-1 proviral DNA in FRhK4 cells subjected to TRIM5 $\alpha$  or Beclin 1 (Bec) knockdowns and infected with VSVG-pseudotyped HIV-1 for 4 h. **(H)** HIV-1 reverse transcriptase (RT) activity in fed or starved rhesus cells (FRhK4) knocked down for indicated factors and infected for 4 h with VSVG-pseudotyped HIV-1. **(I)** GST pull-down analysis of the role of LIR-1 and LIR-2 in TRIM5 $\alpha$  binding to the indicated mAtg8s. **(J)** Representative epifluorescent image of the localization of WT or LIR-1\* $\&$ 2\* RhGFP-TRIM5 $\alpha$  in HeLa cells. **(K)** Representative epifluorescent image of the effect of WT or LIR-1\* $\&$ 2\* GFP-RhTRIM5 $\alpha$  expression on the intracellular distribution of p-ULK1 (Ser 317). **(L)** Representative epifluorescent image of the effect of WT or LIR-1\* $\&$ 2\* GFP-RhTRIM5 $\alpha$  expression on the abundance of autophagosomes detected as punctate LC3B. **(M)** Model of TRIM-based assembly (TRIMosome) of autophagy regulators and effectors directing selective autophagy. Depiction based on SPRY-containing TRIMs and TRIM5 $\alpha$ -based recognition of cargo. Data, means  $\pm$  SE; \*,  $P < 0.05$ ; †,  $P \geq 0.05$  (Student's t test;  $n \geq 3$ ).
